# Supplementary material for: An elevated concentration of MoS2 lowers the efficacy of liquid-phase exfoliation and triggers the production of MoOx nanoparticles
Source: Royal Society of Chemistry journal article supplement (doi:10.1039/c9cp01951k), 2019-01-01
Supplement: c9cp01951k1.pdf [file c9cp01951k1.pdf]

*Supplementary information*

***Elevated concentration of MoS<sub>2</sub> lowers efficacy of liquid-phase exfoliation and triggers production of MoO<sub>x</sub> nanoparticles***

Michal Bodík<sup>\*a</sup>, Adriana Annušová<sup>a,b</sup>, Jakub Hagara<sup>a</sup>, Matej Mičušík<sup>c</sup>, Mária Omastová<sup>c</sup>, Mário Kotlár<sup>d</sup>, Juraj Chlpík<sup>e</sup>, Julius Cirák<sup>e</sup>, Helena Švajdlenková<sup>c</sup>, Michal Anguš<sup>f</sup>, Alicia Marín Roldán<sup>f</sup>, Pavel Veis<sup>f</sup>, Matej Jergel<sup>a</sup>, Eva Majkova<sup>a,b</sup>, and Peter Šiffalovič<sup>a,b</sup>

<sup>a</sup> Institute of Physics, Slovak Academy of Sciences, Dubravská cesta 9, 845 11 Bratislava, Slovakia

<sup>b</sup> Centre of Excellence for Advanced Materials Application, Dubravská cesta 9, 845 11 Bratislava, Slovakia

<sup>c</sup> Polymer Institute, Slovak Academy of Sciences, Dubravská cesta 9, 845 41 Bratislava, Slovakia

<sup>d</sup> Slovak University of Technology, University Science Park Bratislava Centre, Vazovova 5, 812 43 Bratislava, Slovakia

<sup>e</sup> Faculty of Electrical Engineering and Information Technology, Slovak University of Technology in Bratislava, Ilkovicova 3, 812 19 Bratislava, Slovakia

<sup>f</sup> Faculty of Mathematics, Physics and Informatics, Comenius University, Mlynska dolina F1, 842 48 Bratislava, Slovakia

\* corresponding author: Michal.Bodik@savba.sk

**Contents**

|                                           |    |
|-------------------------------------------|----|
| Contents .....                            | 1  |
| Absorbance .....                          | 2  |
| Photoluminescence .....                   | 4  |
| Raman spectroscopy .....                  | 6  |
| XPS analysis .....                        | 7  |
| LIBS analysis .....                       | 12 |
| GIWAXS and GIXRD analysis .....           | 13 |
| TEM and EDS .....                         | 15 |
| Singlet oxygen measurements .....         | 17 |
| Titration curve .....                     | 22 |
| Principal Component Analysis .....        | 23 |
| Investigation of the reaction yield ..... | 25 |
| Preventing the oxidation .....            | 28 |

## Absorbance

The UV-Vis-NIR absorbance measurements were performed using an integral sphere in order to include the absorbed and scattered radiation as well. The samples were filled into a clean quartz cuvette with 1 cm light path. The baseline correction was performed by placing two identical quartz cuvettes filled with 45% ethanol solutions in the reference and sample beams. During the measurements, we always kept the 45% ethanol solution in the reference beam. The absorbance spectra of the samples with different initial MoS<sub>2</sub> concentrations are shown in Fig. S1.

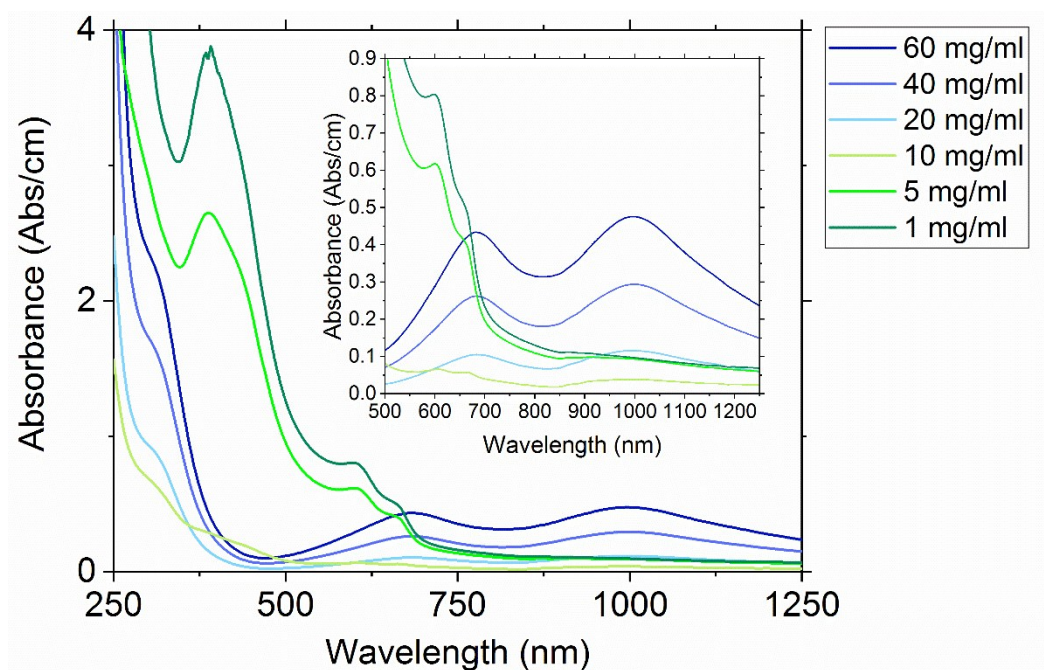

Fig. S1: The absorbance spectra of LPE MoS<sub>2</sub> at different initial concentrations. The inset shows the NIR part of the spectra with scaled absorbance axis.

The absorbance spectra of LPE MoO<sub>2</sub> and MoO<sub>3</sub> nanoparticles (Fig. S2) show similar characteristics in NIR region as the MoO<sub>x</sub> prepared by LPE from MoS<sub>2</sub>. In particular, MoO<sub>2</sub> exhibits similar peaks at approx. 700 nm and 1 000 nm. However, an additional new peak at 800 nm is present in the case of MoO<sub>2</sub>.

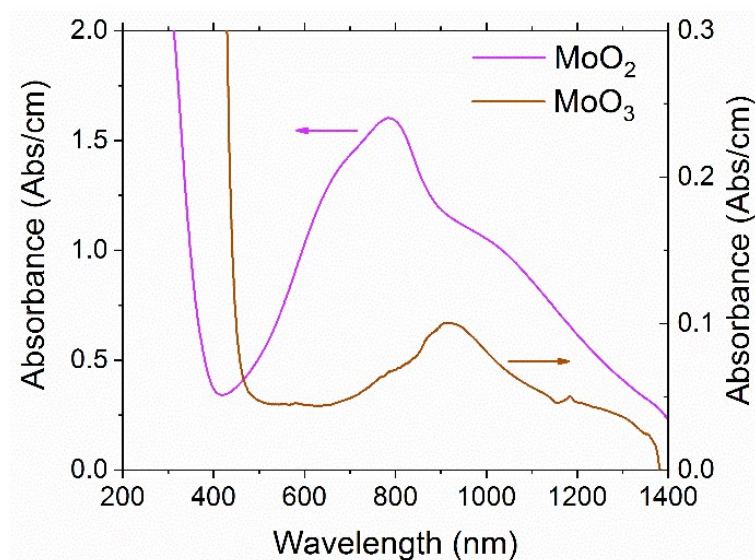

Fig. S2: The absorbance spectra of the  $\text{MoO}_2$  and  $\text{MoO}_3$  samples prepared by LPE at 60 mg/ml concentration.

In rare cases, the LPE initiated oxidation of  $\text{MoS}_2$  resulted in different absorbance spectra. The third peak at approx. 800 nm appeared, similar to the one observed in  $\text{MoO}_2$  absorbance spectrum (Fig. S3). Throughout the experiments, the integral intensity of the 800 nm peak varied. This suggests that the resulting oxides were not always identical.

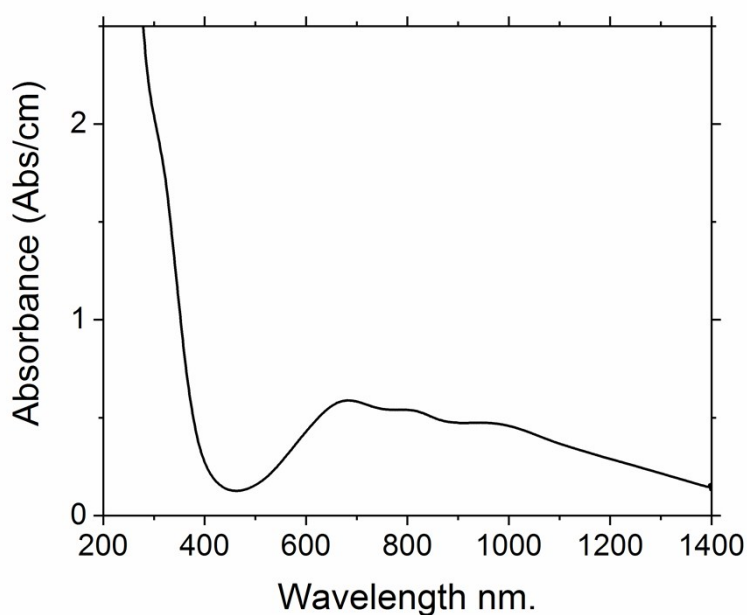

Fig. S3: The absorbance of the sample prepared by LPE at 60 mg/ml concentration of  $\text{MoS}_2$ .

## Photoluminescence

The photoluminescence (PL) spectra of LPE MoS<sub>2</sub> at different initial concentrations were measured with an excitation wavelength of 355 nm. In the first step, we found the PL maximum excited at 355 nm (Fig. S4). Then the PL excitation (PLE) spectra were measured at a fixed detection wavelength of 433 nm, which corresponds to the PL maximum excited at 355 nm (Fig. S5). Contrarily, the LPE MoO<sub>2</sub> and MoO<sub>3</sub> nanoparticles exhibited no PL as it is visible from the excitation spectra (Fig. S5). A second series of PL spectra were measured with the excitation at 317 nm and subsequently self-consistently normalized using the Raman peak of water (Fig. S6).

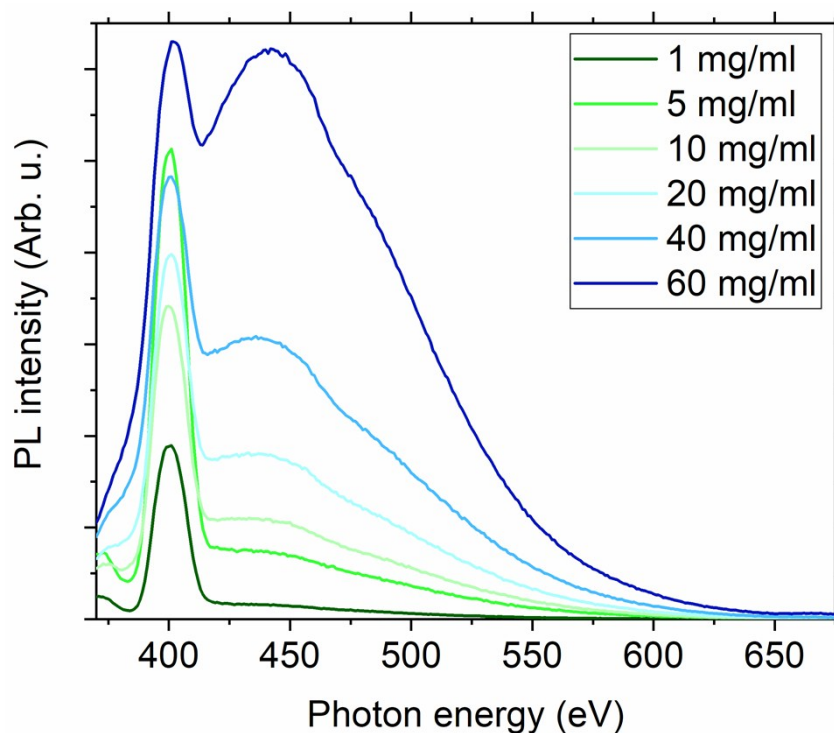

Fig. S4: The PL spectra measured with an excitation wavelength of 355 nm.

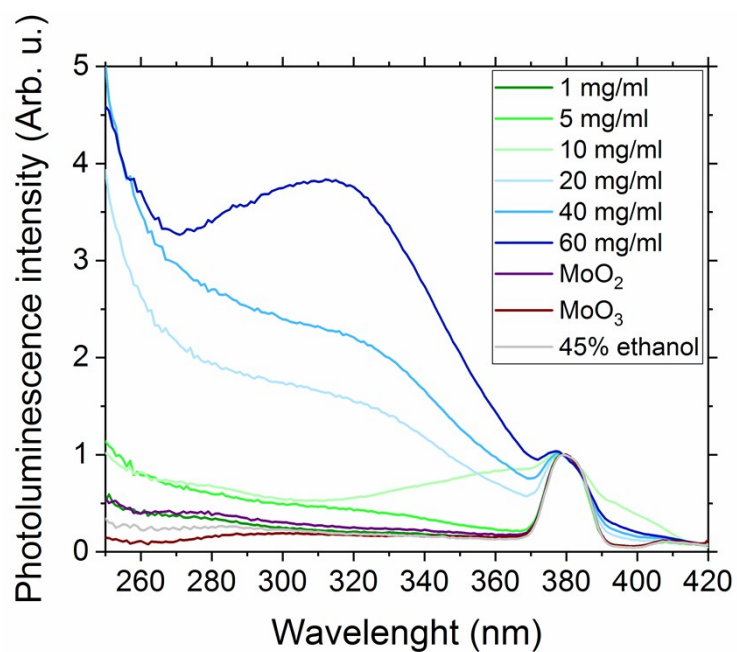

Fig. S5: The PLE spectra measured at the emission wavelength fixed at 433 nm.

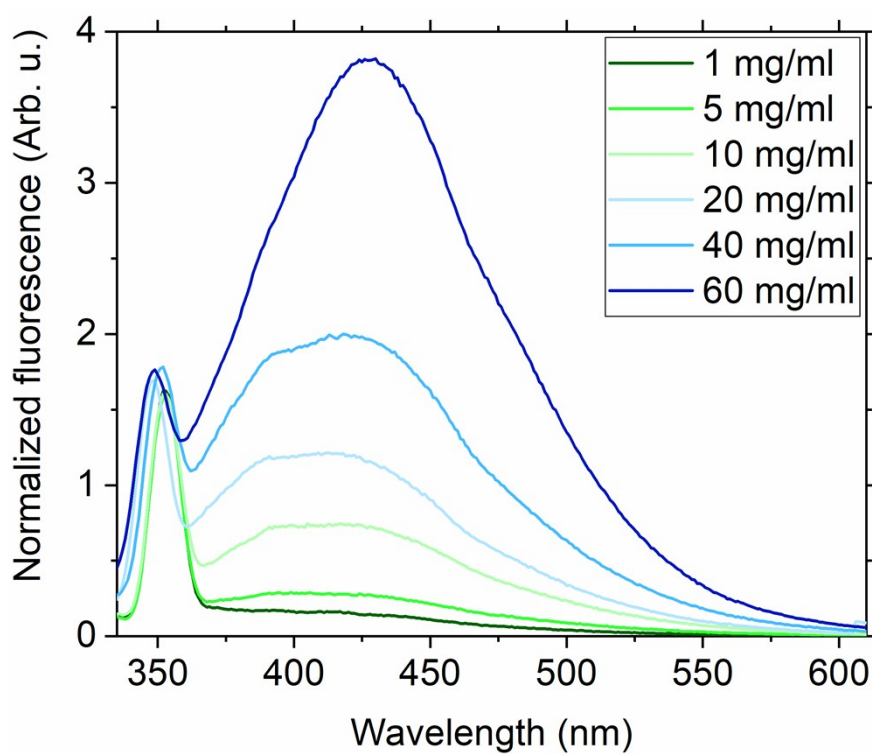

Fig. S6: The normalized PL emission with the excitation wavelength at 317 nm.

## Raman spectroscopy

The Raman spectroscopy was performed in solution using an immersive objective. The objective was carefully cleaned with ethanol before each measurement to exclude possible cross-contamination. The integration time was set to 10 s for each sample. The power of excitation laser at 532 nm line was set to 2 mW. The Raman spectra shown in Fig. S7 confirm the decrease of MoS<sub>2</sub> Raman modes with the increasing initial MoS<sub>2</sub> concentrations. For the concentrations higher than 10 mg/ml only the Raman peaks of ethanol are present in the spectra.

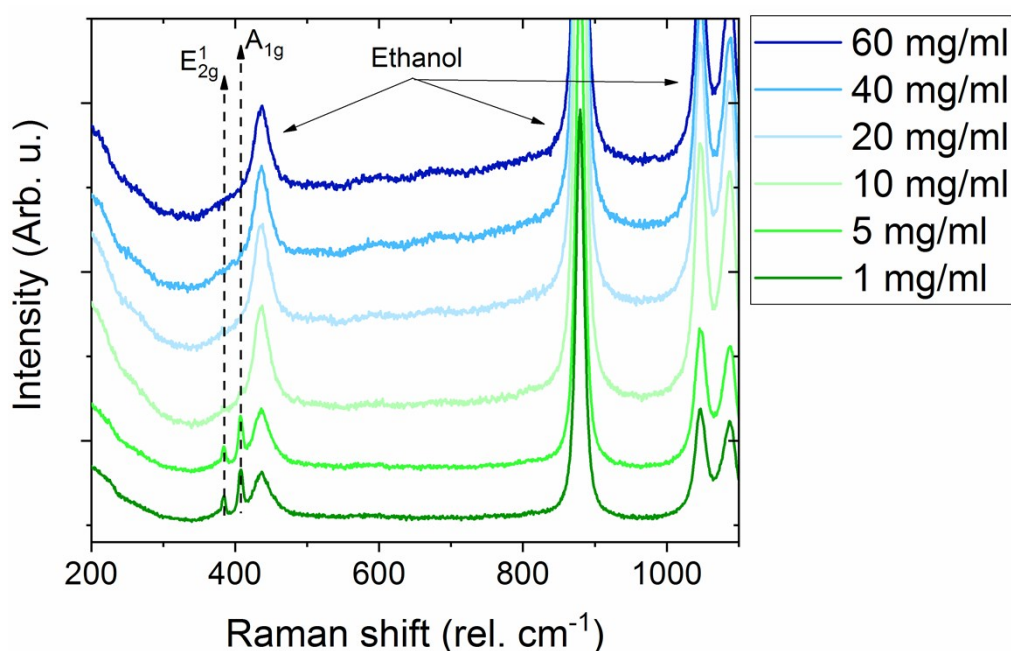

Fig. S7: Raman spectra of LPE samples with increasing initial MoS<sub>2</sub> concentration.

On the other hand, the Raman spectra of MoO<sub>2</sub> (Fig. S8a) and MoO<sub>3</sub> (Fig. S8b) LPE solutions exhibited a weak peak at 820 rel. cm<sup>-1</sup>, that can be assigned to the  $\alpha$ -MoO<sub>3</sub> phase. The MoO<sub>3</sub> solution showed additional weak peaks at approx. 1000 rel. cm<sup>-1</sup> and 290 rel. cm<sup>-1</sup>. Surprisingly, the MoO<sub>2</sub> solution did not show any peak corresponding to MoO<sub>2</sub> phase.

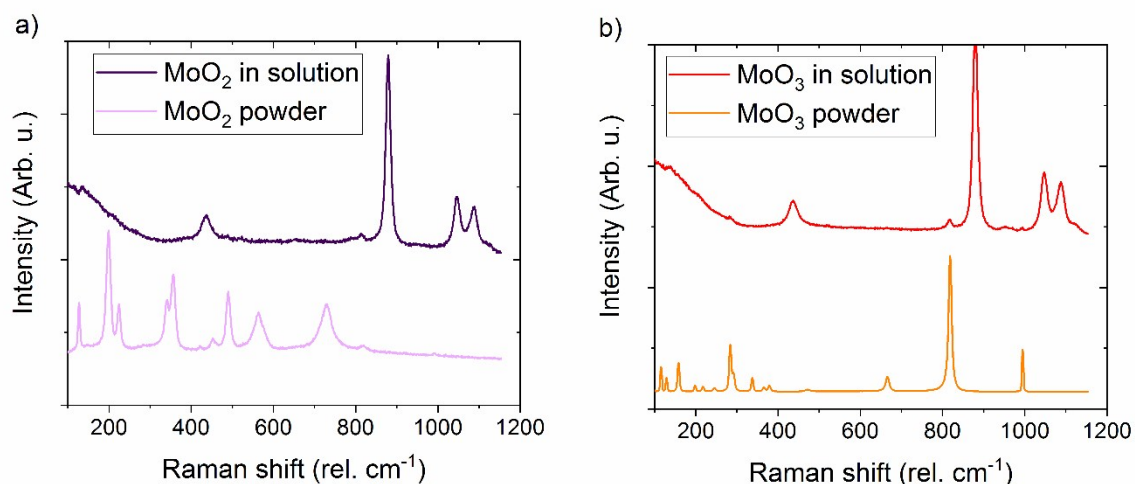

Fig. S8: The Raman spectra of pristine powders and the corresponding LPE solutions for a)  $\text{MoO}_2$  and b)  $\text{MoO}_3$ .

### XPS analysis

The high-resolution Mo 3d XPS spectrum of the sample prepared from the initial  $\text{MoS}_2$  concentration of 1 mg/ml is shown in Fig. S9. No core-level shifts belonging to Mo oxides are visible in XPS spectrum. With the increase of initial  $\text{MoS}_2$  concentration, new peaks corresponding to  $\text{Mo}^{5+}$ ,  $\text{Mo}^{6+}$  and  $\text{SO}_3$  states appeared (Fig. S10 – S14). The processed  $\text{MoO}_2$  and  $\text{MoO}_3$  powders contained only  $\text{Mo}^{5+}$  and  $\text{Mo}^{6+}$  bonded electrons in the Mo 3d shell (Fig. S15 – S16). A detailed composition of the samples is given in Table S1.

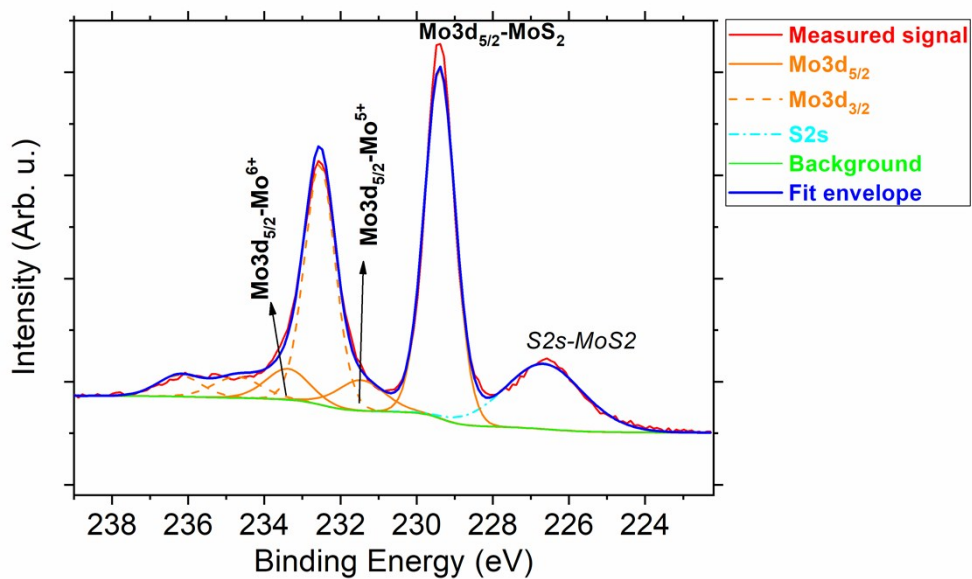

Fig. S9: The high-resolution XPS spectrum of the sample prepared from 1 mg/ml initial concentration of MoS<sub>2</sub>.

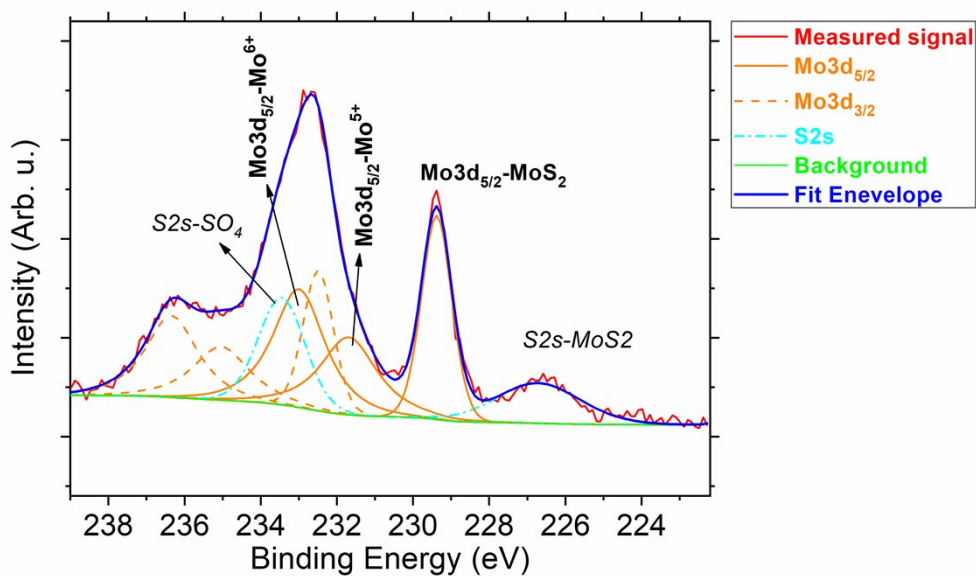

Fig. S10: The high-resolution XPS spectrum of the sample prepared from 5 mg/ml initial concentration of MoS<sub>2</sub>.

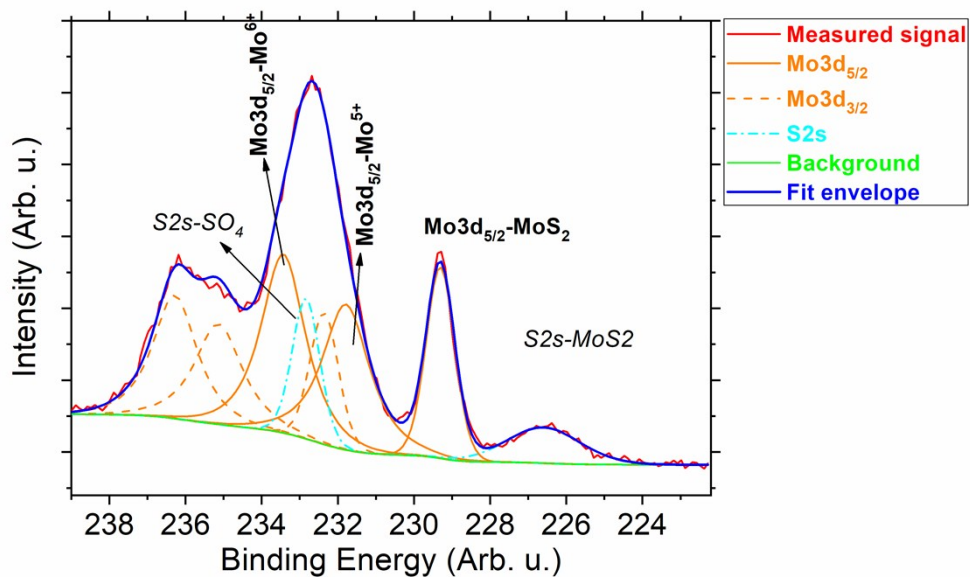

Fig. S11: The high-resolution XPS spectrum of the sample prepared from 10 mg/ml initial concentration of MoS<sub>2</sub>.

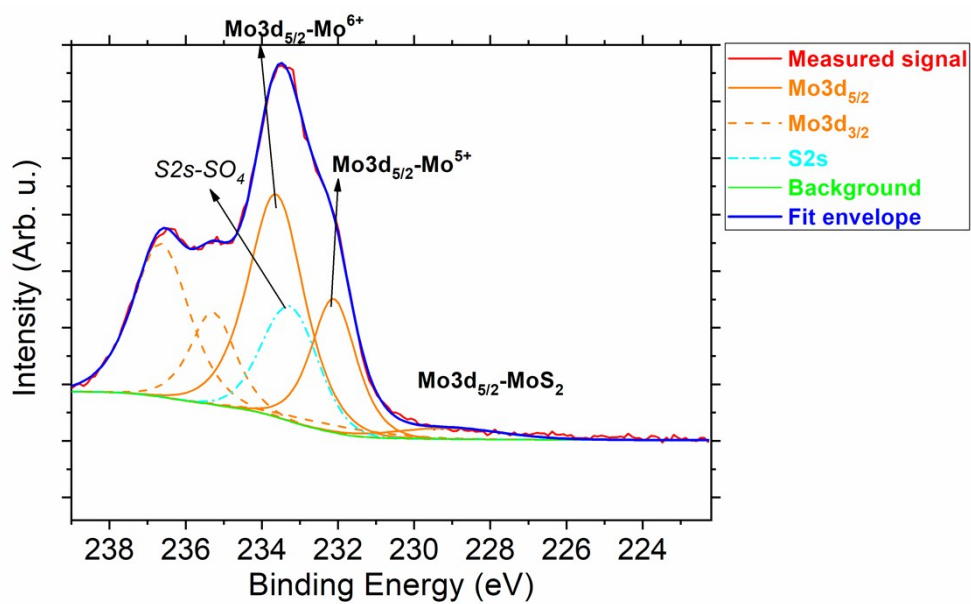

Fig. S12: The high-resolution XPS spectrum of the sample prepared from 20 mg/ml initial concentration of MoS<sub>2</sub>.

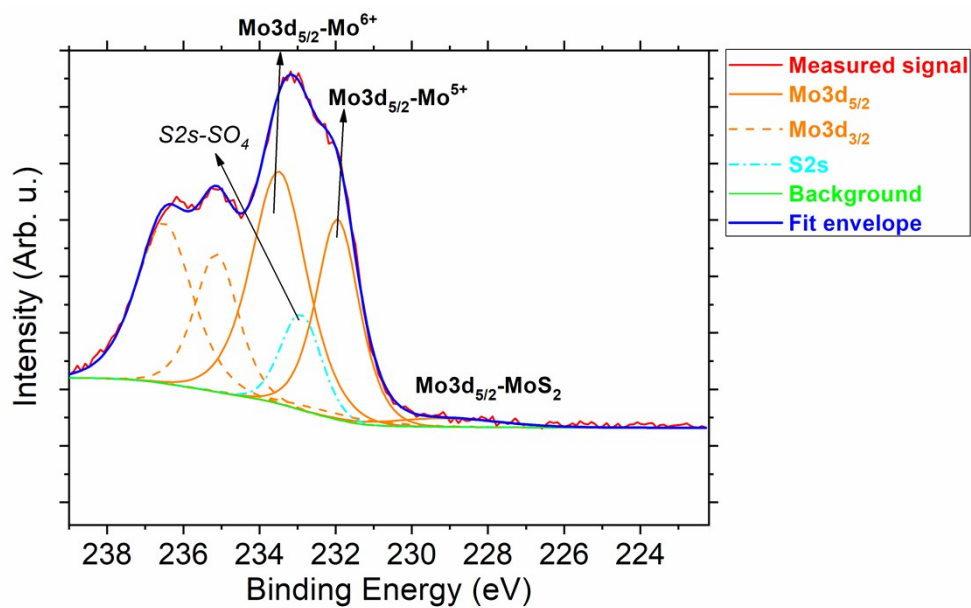

Fig. S13: The high-resolution XPS spectrum of the sample prepared from 40 mg/ml initial concentration of  $\text{MoS}_2$ .

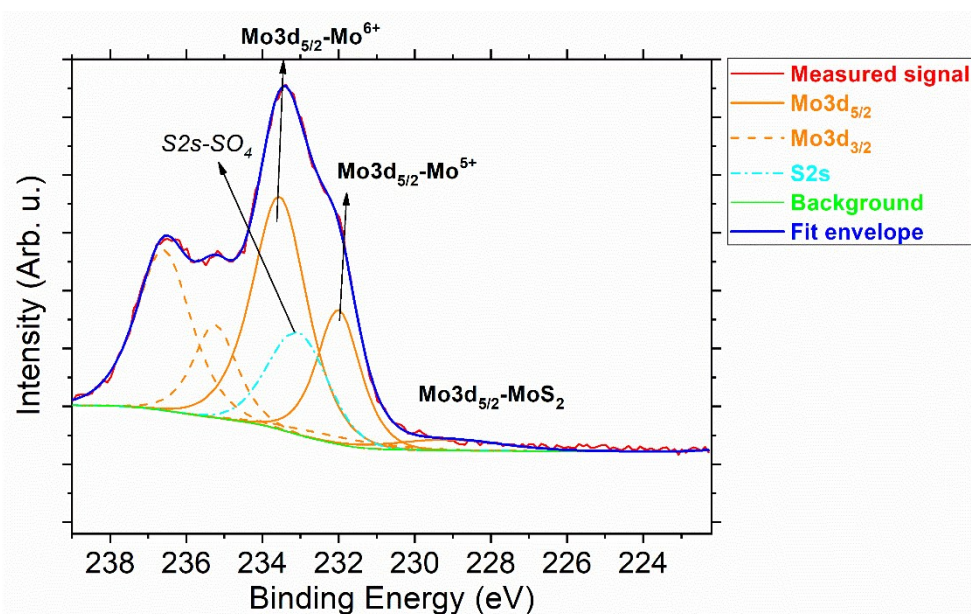

Fig. S14: The high-resolution XPS spectrum of the sample prepared from 60 mg/ml initial concentration of  $\text{MoS}_2$ .

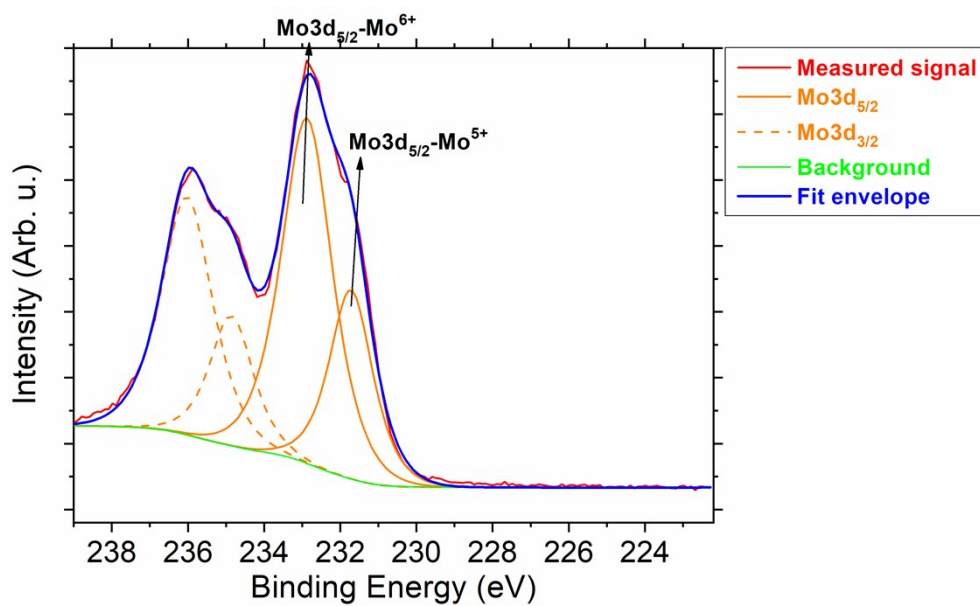

Fig. S15: The high-resolution XPS spectrum of the sample prepared from 60 mg/ml initial concentration of MoO<sub>2</sub>.

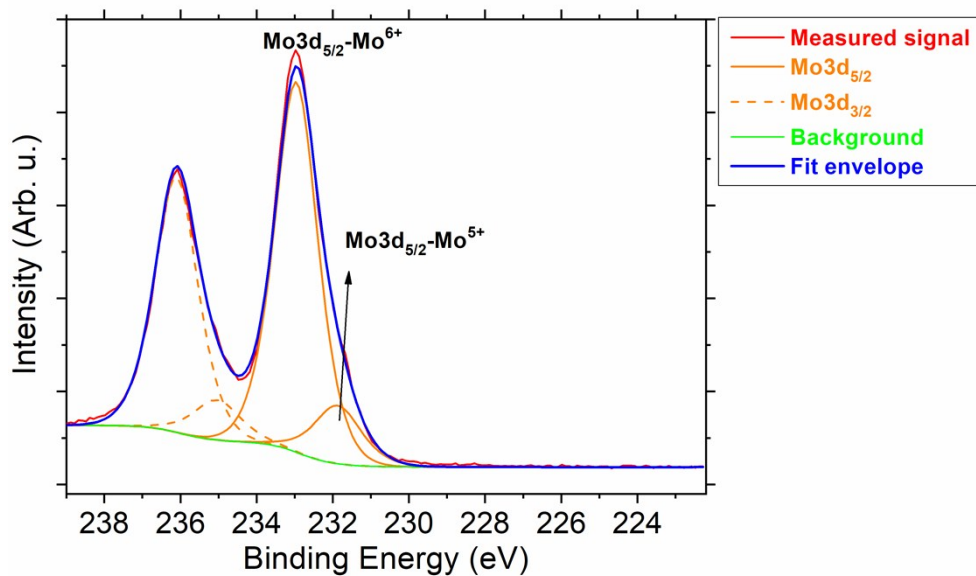

Fig. S16: The high-resolution XPS spectrum of the sample prepared from 60 mg/ml initial concentration of MoO<sub>3</sub>.

Table 1: Detailed surface chemical composition of MoO<sub>x</sub> samples.

| Sample           | Surface chemical composition [at.%]                                               |                                                                   |                                      |                             |      |
|------------------|-----------------------------------------------------------------------------------|-------------------------------------------------------------------|--------------------------------------|-----------------------------|------|
|                  | Mo3d<br>MoS <sub>2</sub> /Mo <sup>5+</sup> /Mo <sup>6+</sup><br>229.4/231.7/232.6 | S2p<br>MoS <sub>2</sub> /S-O/SO <sub>3</sub><br>162.3/165.8/168.9 | O1s<br>MoO <sub>x</sub> /C=O/C-<br>O | C1s<br>C-C/C-<br>O/C=O/OC=O | Si2p |
| MoO <sub>2</sub> | —/4.5/9.6                                                                         | —                                                                 | 38.4/6.8/4.5                         | 18.2/14.5/2.4/1.1           | —    |
| MoO <sub>3</sub> | —/2.0/11.5                                                                        | —                                                                 | 35.2/4.4/4.2                         | 27.4/11.3/2.3/1.7           | —    |
| 1mg/ml           | 6.9/0.9/0.9                                                                       | 15.5/1.8/5.3                                                      | 3.3/19.2/8.1                         | 13.9/3.1/1.8/1.0            | 18.4 |
| 5mg/ml           | 0.8/0.7/0.9                                                                       | 2.4/2.4/9.4                                                       | 3.4/36.0/8.0                         | 5.1/1.8/1.3/0.8             | 27.0 |
| 10mg/ml          | 1.0/1.5/1.7                                                                       | 2.7/1.7/7.5                                                       | 9.8/27.5/7.1                         | 16.5/2.7/0.9/1.0            | 18.4 |
| 20mg/ml          | 0.3/1.6/3.2                                                                       | 0.1/0.3/13.0                                                      | 11.5/34.4/16.0                       | 16.1/0.7/1.9/1.1            | —    |
| 40mg/ml          | 0.2/2.2/3.3                                                                       | 0.3/0.8/8.7                                                       | 13.3/27.7/11.5                       | 18.1/4.7/0.9/1.2            | 7.1  |
| 60mg/ml          | 0.3/1.5/3.2                                                                       | 0.2/0.5/10.9                                                      | 13.0/27.4/13.8                       | 19.4/3.5/1.0/1.3            | 4.2  |

### LIBS analysis

The surface-assisted Laser Induced Breakdown Spectroscopy (LIBS) measurements were performed in a vacuum chamber under Ar atmosphere at 10 Torr to determine the decrease of the concentration of sulfur. The solution of MoS<sub>2</sub> was dropped on a pure cleaned Al substrates. Simulated LIBS spectra using the NIST LIBS web application show that the S I-III lines are dominant in the VUV spectral range. Thus, enlarging the spectral down to the VUV region, it is possible to detect sulfur lines at our current experimental conditions ( $T_e \sim 1.21$  eV and  $n_e \sim 3 \cdot 10^{17}$  cm<sup>-3</sup>) [Figure 2 at ref. 51 from main text]. We focused on the sulfur lines in the vacuum UV region (140 nm – 200 nm), showing the spectral lines S I at 129.57 nm and 131.02 nm, and O I at 130.22 nm, 130.49 nm and 130.60 nm (Fig. S17); and S I lines at 180.73 nm and 182.03 nm, and Al II lines at 181.84 nm, 181.93 nm and 182.01 nm (Fig. S18).

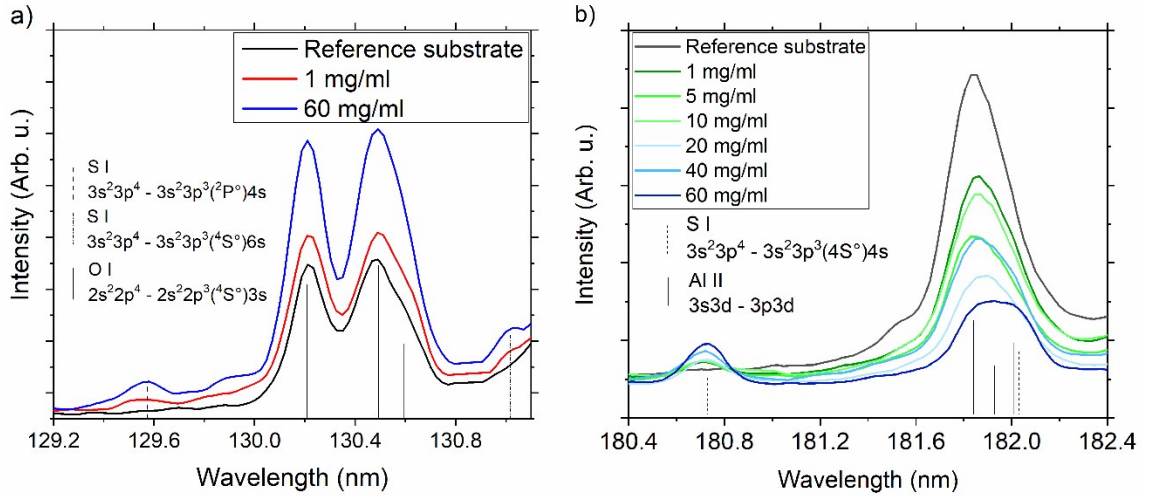

Fig. S17: Vacuum UV LIBS spectra for samples prepared from different initial concentrations for a) for S I at 129.57 nm and 131.02 nm, and O I at 130.22 nm, 130.49 nm and 130.60 nm, and b) S I lines at 180.73 nm and 182.03 nm, and Al II lines at 181.84 nm, 181.93 nm and 182.01 nm.

### GIWAXS and GIXRD analysis

Fig. S18 and Fig. S19 show the GIWAXS patterns of LPE samples prepared from  $\text{MoO}_2$  and  $\text{MoO}_3$  powders, respectively. Neither of them shows an oriented  $\text{MoO}_x$  phase (compare to Fig. 6b in the main text).

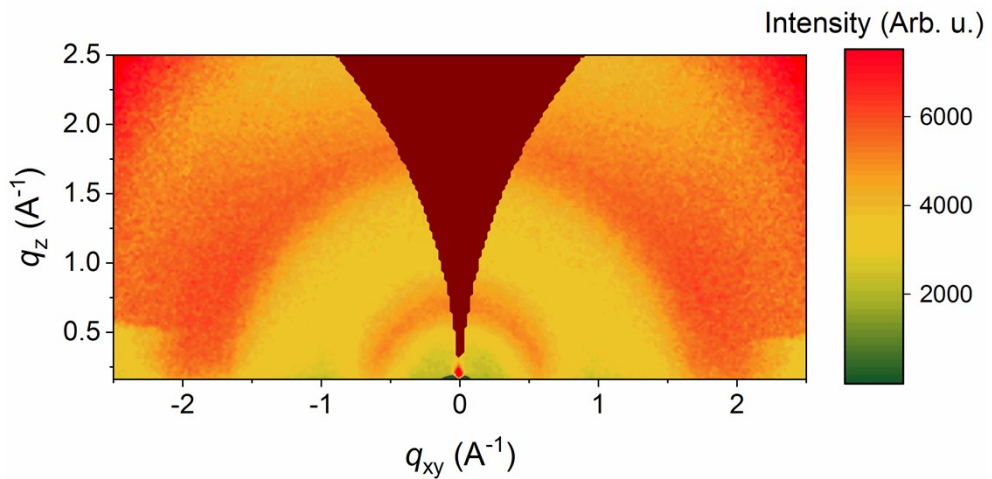

Fig. S18: GIWAXS pattern of the sample prepared from 60 mg/ml initial concentration of  $\text{MoO}_2$ .

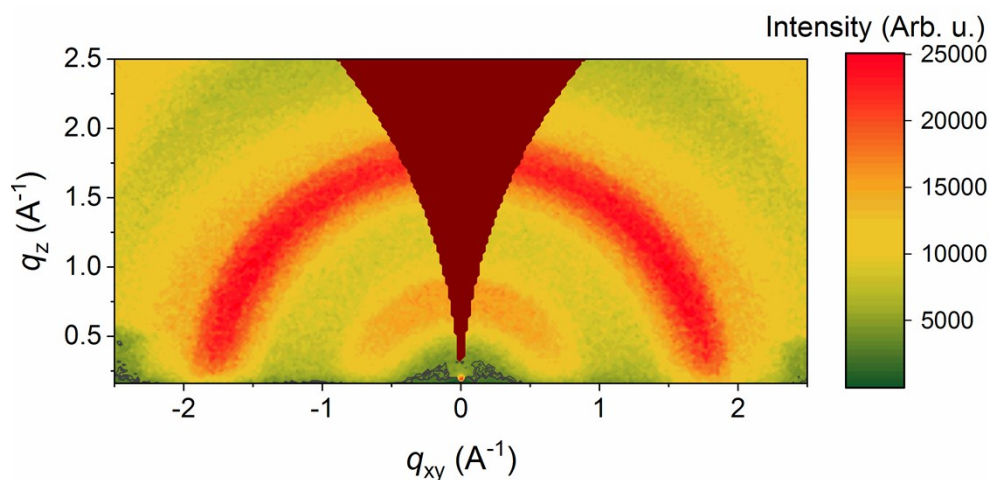

Fig. S19: GIWAXS pattern of the sample prepared from 60 mg/ml initial concentration of  $\text{MoO}_3$ .

In order to further study the evolution of different  $\text{MoO}_x$  phases, we performed complementary GIXRD measurements (angle of incidence  $1^\circ$ ) with varying initial  $\text{MoS}_2$  concentrations (Fig. S20). The samples prepared from the initial concentrations of 1, 5 and 10 mg/ml display only 002 diffraction peak ( $2\theta = 14.4^\circ$ ) of  $\text{MoS}_2$  phase. For the concentrations above 10 mg/ml, new peaks were observed in GIXRD spectra coming from a variety of  $\text{MoO}_x$  phases with oxygen-deficient stoichiometry. These peaks can be assigned e.g. to  $\text{Mo}_4\text{O}_{11}$ ,  $\text{Mo}_{17}\text{O}_{47}$ ,  $\text{Mo}_9\text{O}_{26}$  and  $\chi\text{Mo}_8\text{O}_{23}$  phases.

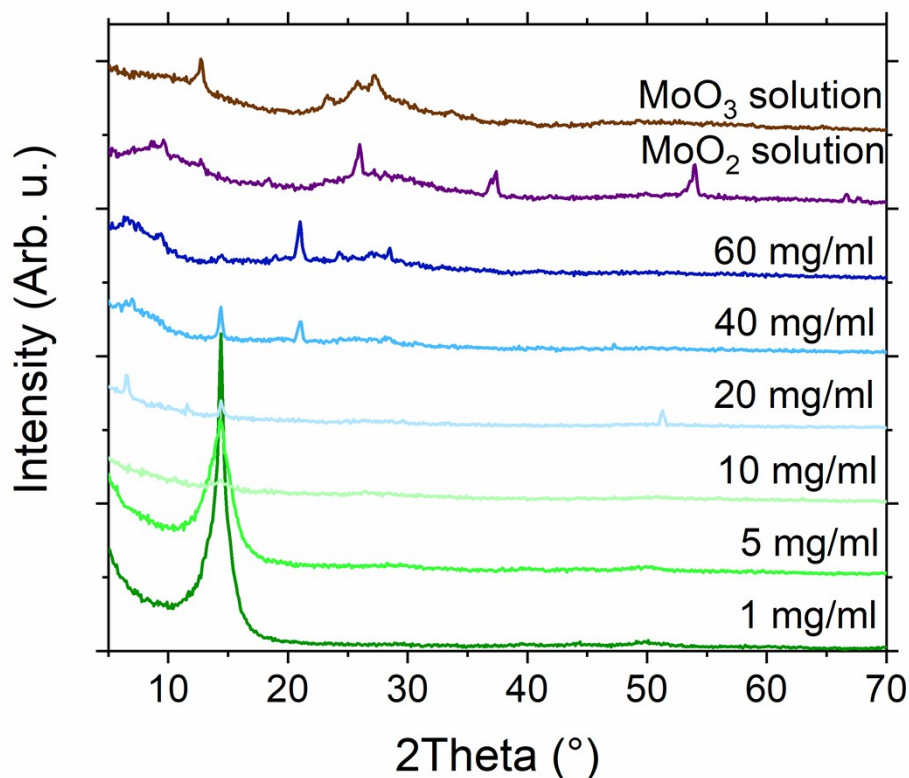

Fig. S20: GIXRD patterns of all LPE samples prepared from MoS<sub>2</sub>, MoO<sub>2</sub> and MoO<sub>3</sub> powders.

### TEM and EDS

TEM revealed a high dispersion in the size of nanoparticles exfoliated from an initial MoS<sub>2</sub> concentration of 60 mg/ml. The TEM micrographs confirm the presence of smaller (Fig. S21) as well as larger nanoparticles (Fig. S22). The observed two classes of nanoparticles may differ in stoichiometry. In order to provide evidence for this, the size-exclusion chromatography would be a suitable separation technique. However, this goes beyond the scope of this study. The EDS measurements shown in Fig. S23 confirmed, that the nanoparticles contain Mo atoms. However, the overlap of Mo (2.29 eV) and S (2.31 eV) signals prevented a more exact evaluation of the Mo/S ratio.

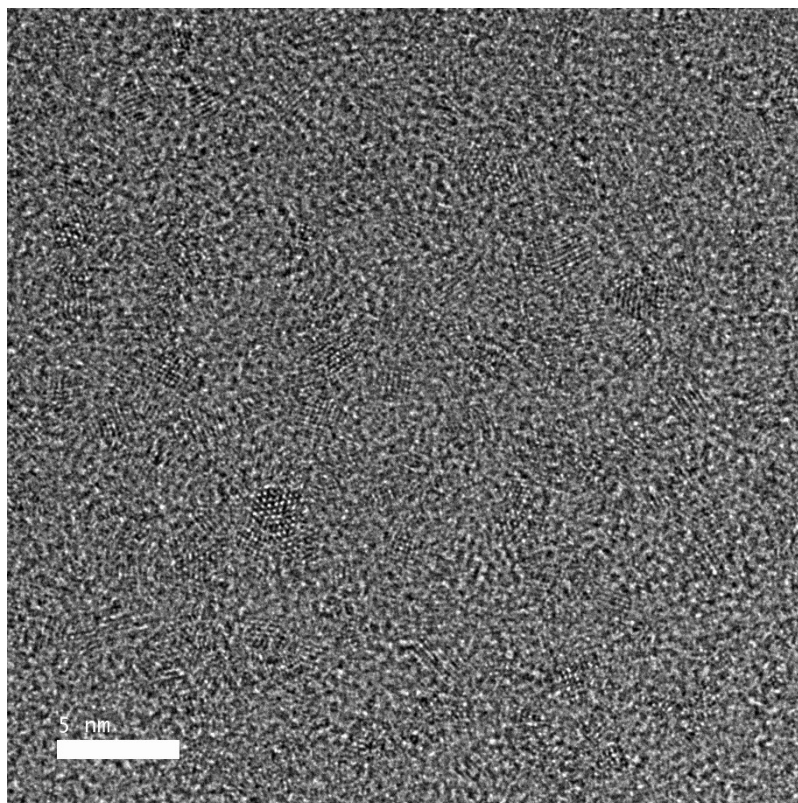

Fig. S21: TEM image of the area containing smaller MoO<sub>x</sub> particles.

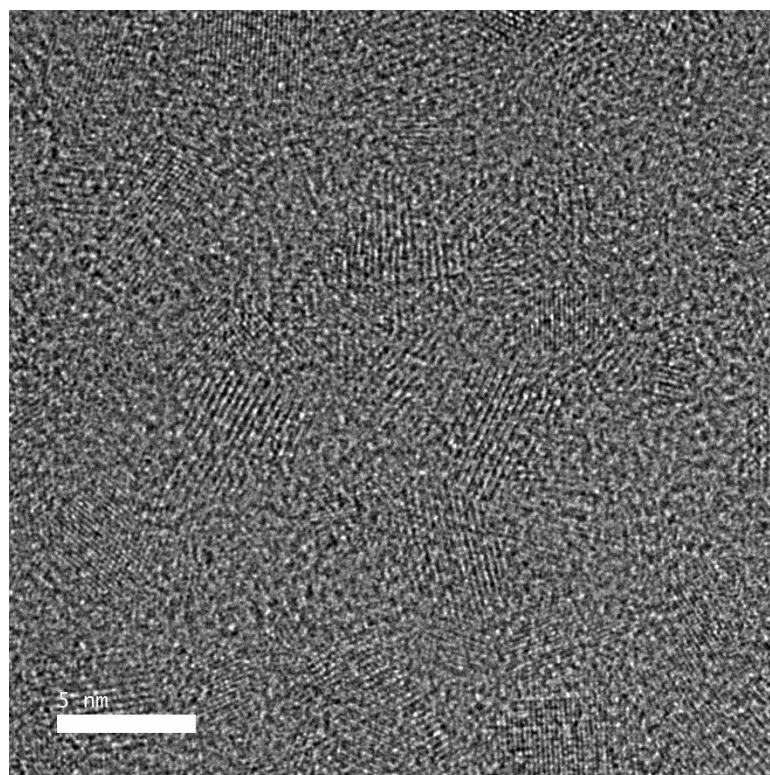

Fig. S22: TEM image of the area containing larger MoO<sub>x</sub> particles.

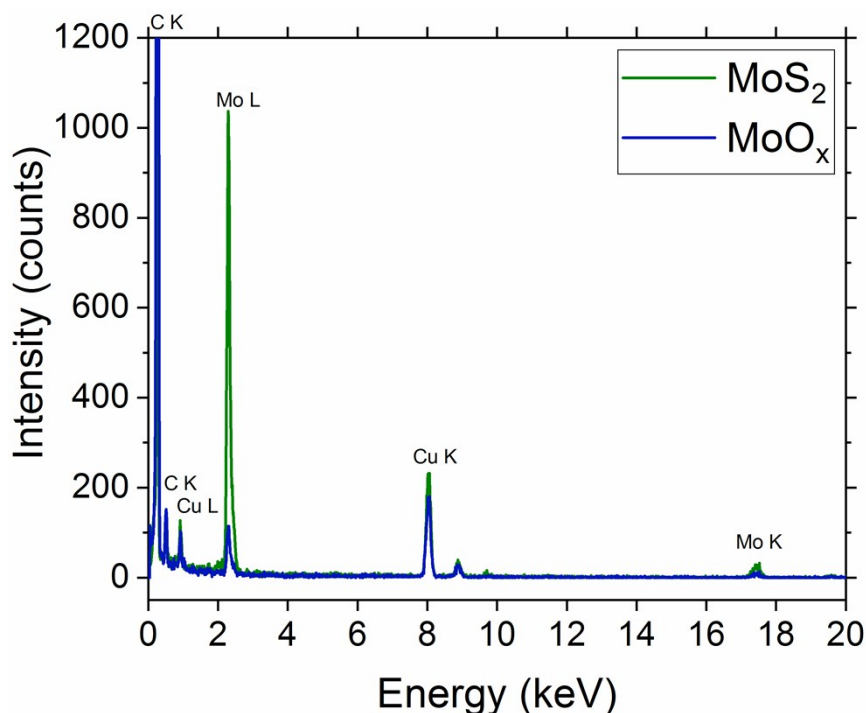

Fig. S23: EDS spectra of MoS<sub>2</sub> (prepared from 1 mg/ml) and MoO<sub>x</sub> (prepared from 60 mg/ml) nanoparticles.

### Singlet oxygen measurements

The EPR experiments were performed at ambient temperature (37 °C) using a Varian E-line spectrometer operating at a nominal frequency of 9.5 GHz. To follow the formation of singlet oxygen (<sup>1</sup>O<sub>2</sub>), 2,2,6,6-tetramethylpiperidine (TEMP) was used as a spin trap. TEMP molecules quickly react with <sup>1</sup>O<sub>2</sub> and form a stable, EPR active product, TEMP-1O<sub>2</sub> (TEMPO). For each MoO<sub>x</sub> sample, 2 ml of MoO<sub>x</sub> solutions were mixed with 90 µl of TEMP solution in ethanol. The prepared mixtures were exposed to blue light irradiation (P=15 W, t=12 h, λ=470 nm) at the temperature of 37 °C in the air-saturated environment. Aliquots (10 µl) of the TEMP solution from the control and the samples with an initial concentration of 20 mg/ml, 40 mg/ml and 60 mg/ml samples were then transferred into 2-3 mm (inner diameter) quartz tubes and the TEMPO signal was detected by EPR.

The concentration of generated singlet oxygen was estimated based on the creating (forming) of TEMPO which is produced during the photochemical reaction in the solutions. We calculated the integrated intensity of EPR spectrum of 2,2-diphenyl-1-picrylhydrazyl (DPPH) solution (at a concentration identical to MoO<sub>x</sub> samples). An identical aliquot of 10 µl was used. The integrated intensity of EPR signals of TEMPO in each spectrum was calculated and divided by the value obtained for DPPH solution.

The production of singlet oxygen in MoO<sub>x</sub> samples after a 12 h exposure to blue light was analyzed. The spin concentration of TEMP for the MoO<sub>x</sub> samples are presented in Table S2. The sample with an initial concentration of MoS<sub>2</sub> of 60 mg/ml has one order of magnitude larger number of spins in comparison to the samples exfoliated from 20 mg/ml and 40 mg/ml solutions. The number of spins is directly proportional to the concentration of singlet oxygen produced by the nanoparticles. The EPR spectra of the individual samples are given in Fig. S24 – S29. We can see that intensities of characteristic EPR signals are much lower for the samples with initial concentrations of 20 mg/ml and 40 mg/ml compared to 60 mg/ml.

Table S2: The measured concentration of spin for MoO<sub>x</sub> samples.

| Initial concentration | Absolute concentration of spins |
|-----------------------|---------------------------------|
| 20 mg/ml              | $2.8 \times 10^{14}$            |
| 40 mg/ml              | $2.8 \times 10^{14}$            |
| 60 mg/ml              | $2 \times 10^{15}$              |

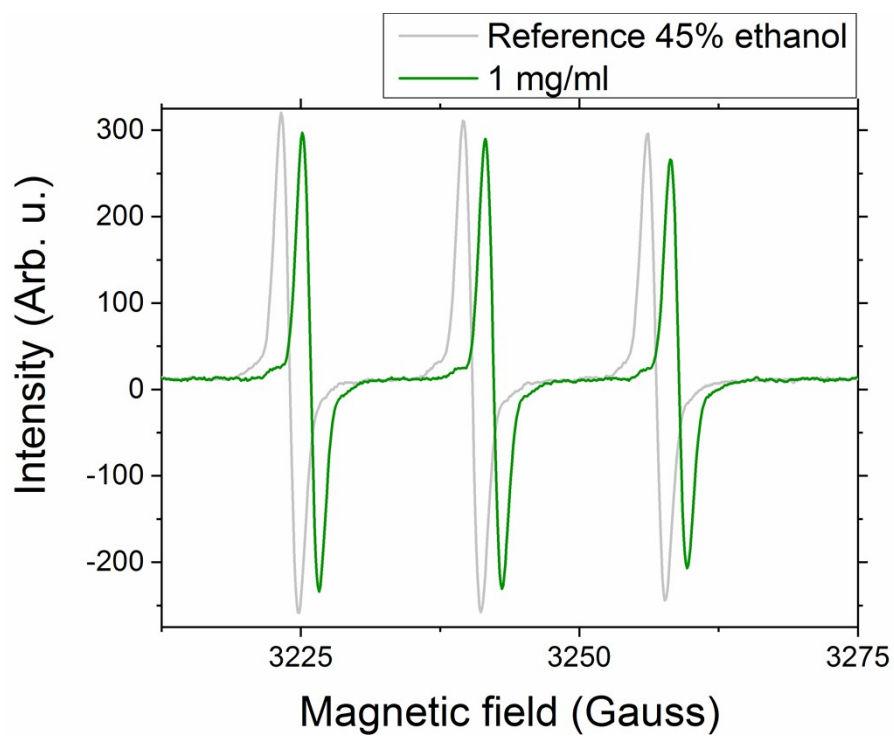

Fig. S24: The EPR spectrum of the irradiated sample prepared from an initial concentration of 1 mg/ml.

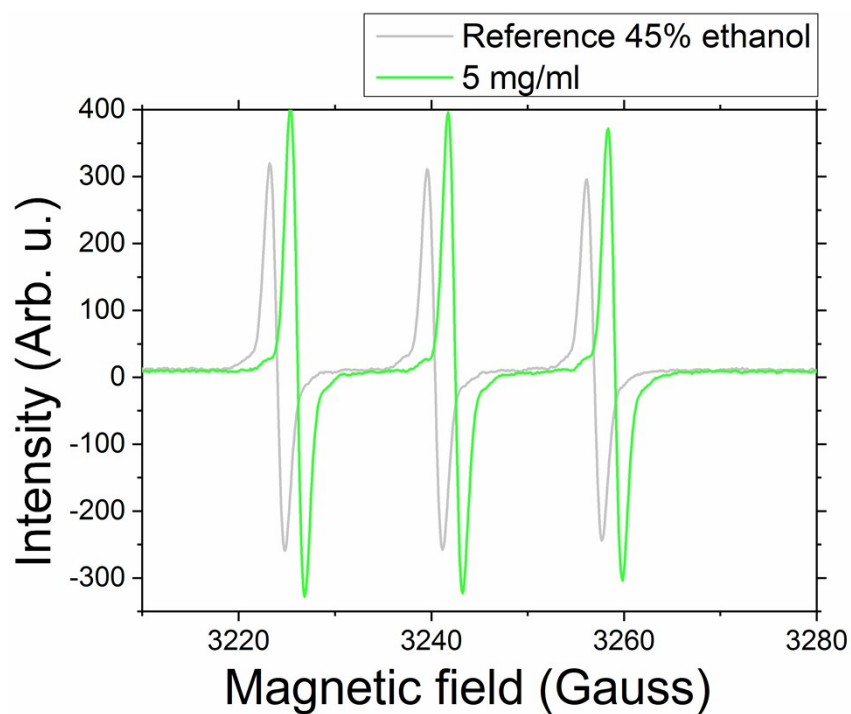

Fig. S25: The EPR spectrum of the irradiated sample prepared from an initial concentration of 5 mg/ml.

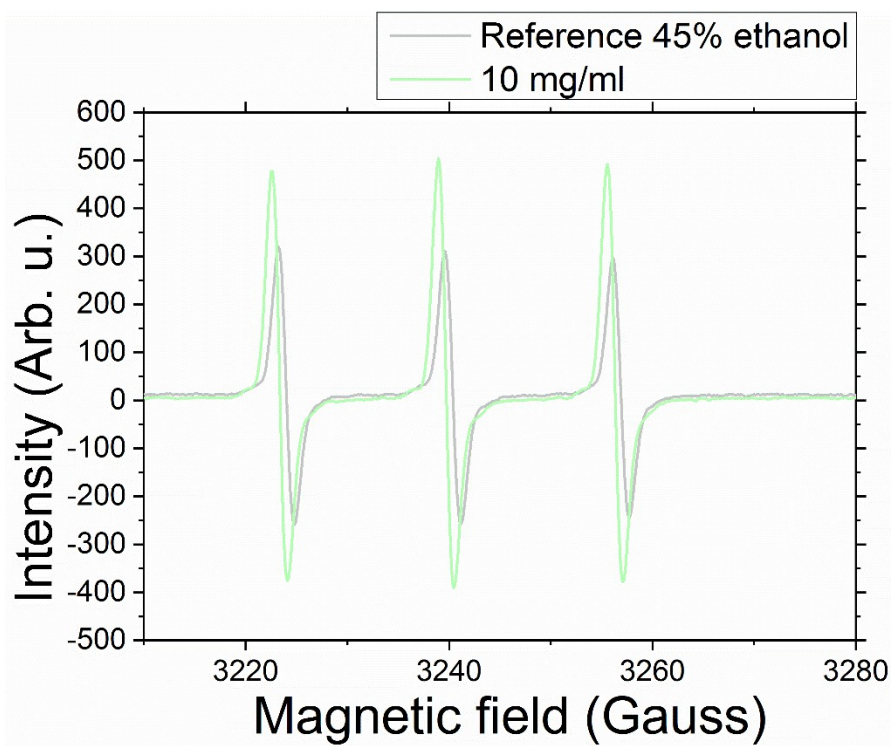

Fig. S26: The EPR spectrum of the irradiated sample prepared from an initial concentration of 10 mg/ml.

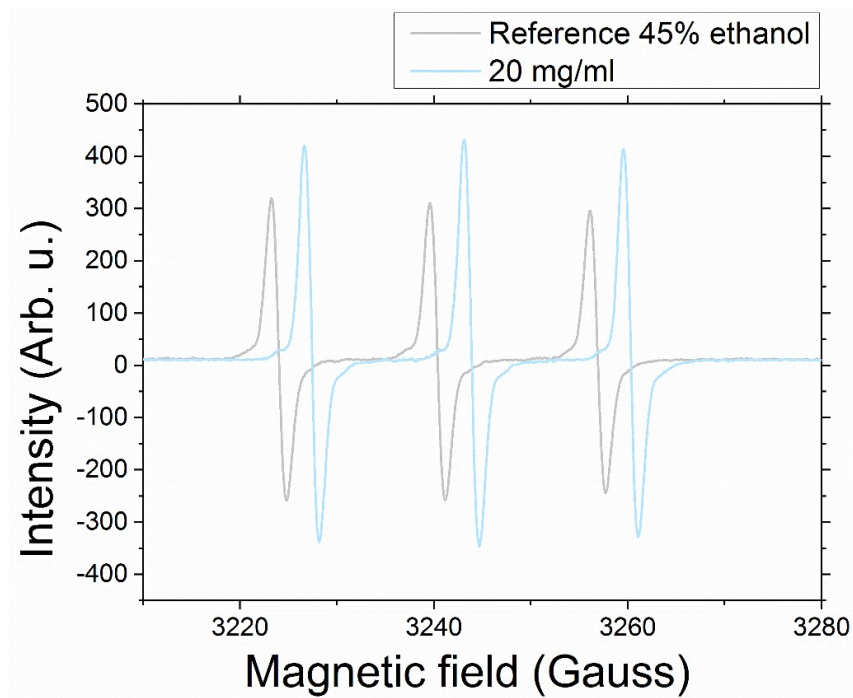

Fig. S27: The EPR spectrum of the irradiated sample prepared from an initial concentration of 20 mg/ml.

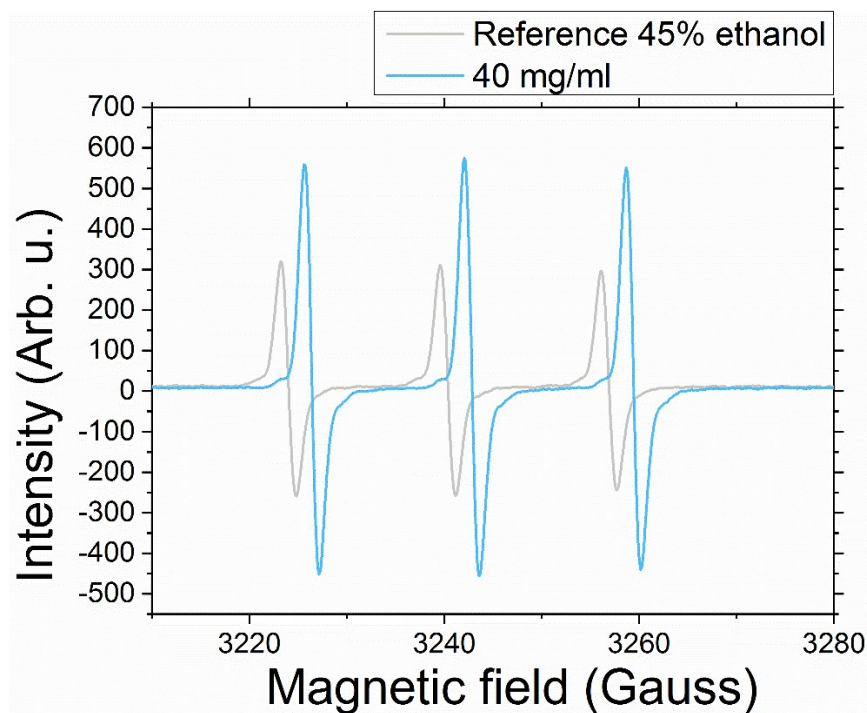

Fig. S28: The EPR spectrum of the irradiated sample prepared from an initial concentration of 40 mg/ml.

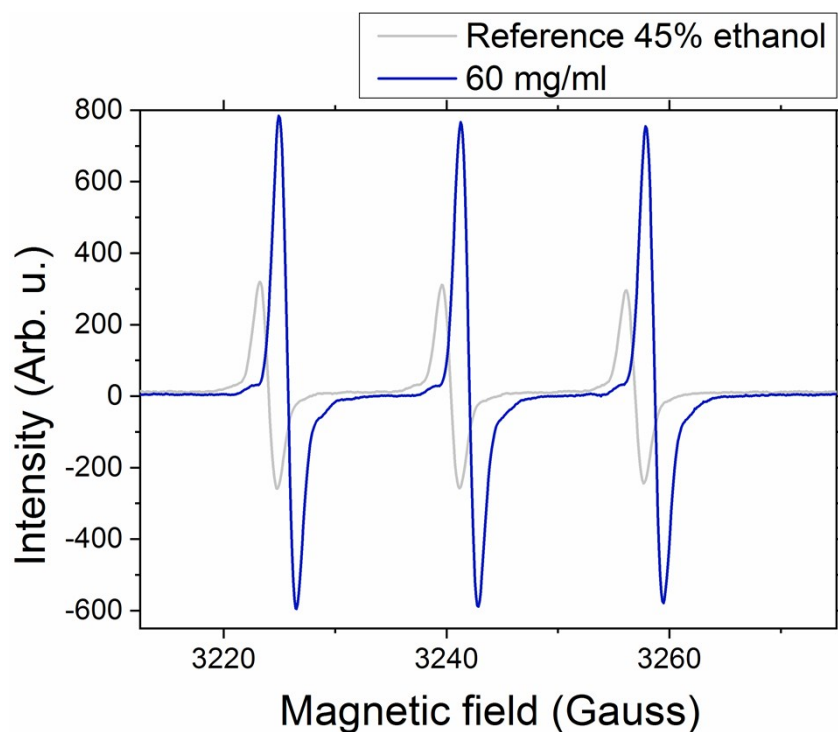

Fig. S29: The EPR spectrum of the irradiated sample prepared from an initial concentration of 60 mg/ml.

## Titration curve

We measured the absorbance titration curves of all exfoliated products. The experiment was performed by successively changing the pH values followed by centrifugation and extraction of supernatant. The absorbance is directly related to the stability of solution at the given pH. The stronger the absorbance the more stable is the solution at the given pH. Fig. S30 shows the photography of the samples exfoliated from the 1 mg/ml MoS<sub>2</sub> concentration. The pH range spans from 1.61 on the left side to 11.47 on the right side. The photography (Fig. S31) of the MoO<sub>x</sub> solutions (initial concentration 60 mg/ml) shows, that unlike the MoS<sub>2</sub> the MoO<sub>x</sub> is stable in the given range of pH (1.73 – 10.77). This titration experiment points to the fact that the net surface charge of MoS<sub>2</sub> nanoflakes is negative. Moreover, this indicates that we cannot observe coexistence of both phases at low pH values (below 2.7).

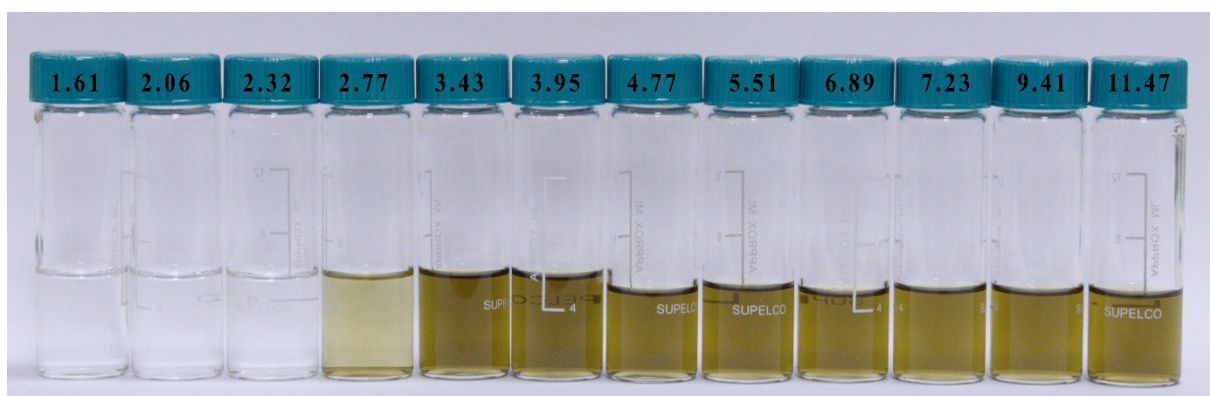

Fig. S30: The photography of MoS<sub>2</sub> samples with modified pH after centrifugation.

The number indicates pH of the respective solution.

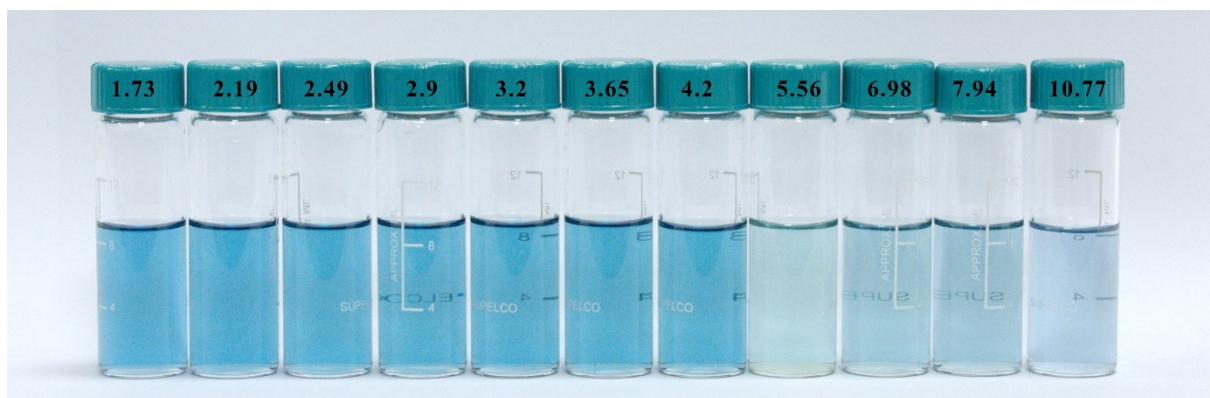

Fig. S31: The photography of  $\text{MoO}_x$  samples with modified pH after centrifugation.

The number indicates pH of the respective solution.

### Principal Component Analysis

The PCA was used to elucidate relations between individual samples taking into account correlation between the results of various experimental techniques. We used 24 different inputs, each input being one result from an analytical technique as a function of initial concentration of  $\text{MoS}_2$ . The area of an absorption peak, the PL intensity, etc. For the calculation, the correlation matrix method was employed. The first 7 of the total of 24 eigenvectors of PCA can explain 100% of the total variance (Table S3). The first two Principal Components (PC) were used to plot the scores of individual samples. In the two-dimensional PCA plot, the oxidation path of  $\text{MoS}_2$  towards  $\text{MoO}_x$  follows roughly a straight line (Fig. S32). In Fig. S33 we plotted the identical data using the first three PCs, that describe almost 90% of all observed variations. In the landscape of three PCs, the oxidation path has a parabolic shape, while the exfoliated  $\text{MoO}_2$  and  $\text{MoO}_3$  samples are located in the opposite corner of the PC space suggesting their different behavior. The non-random parabolic oxidation path shows a correlation between the LPE  $\text{MoS}_2$  samples suggesting that the oxidation is a progressive continuous process.

Table S3: The calculated eigenvalues corresponding to the first two PCs.

| PC | Eigenvalue | Percentage of variance | Cumulative |
|----|------------|------------------------|------------|
| 1  | 13.41901   | 55.91%                 | 55.91%     |
| 2  | 5.49297    | 22.89%                 | 78.80%     |
| 3  | 2.5834     | 10.76%                 | 89.56%     |
| 4  | 1.32658    | 5.53%                  | 95.09%     |
| 5  | 0.58473    | 2.44%                  | 97.53%     |
| 6  | 0.34075    | 1.42%                  | 98.95%     |
| 7  | 0.25255    | 1.05%                  | 100%       |
| 8  | 0          | 0%                     | 100%       |

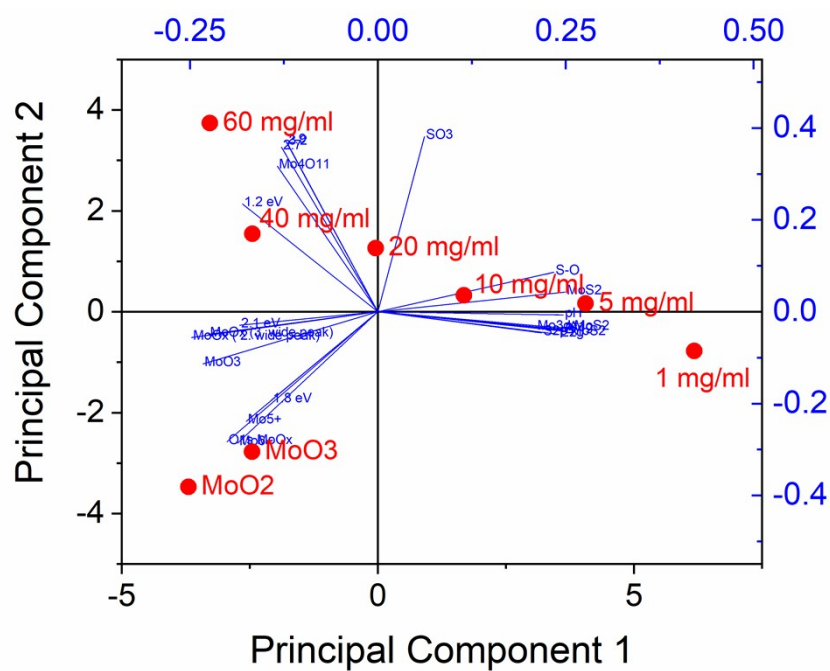

Fig. S32: The 2D PCA plot with the loading vectors.

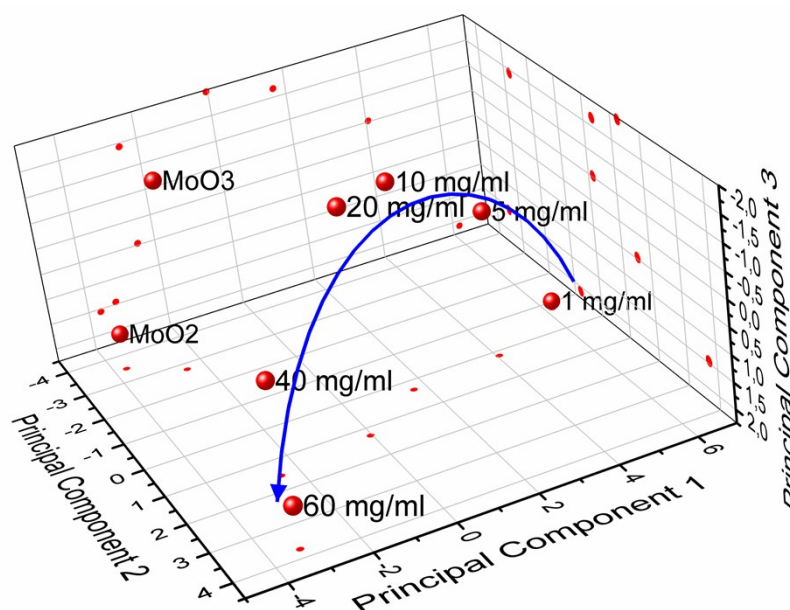

Fig. S33: 3D PCA plot using the first three PCs. The oxidation follows a parabolic path, while the final  $\text{MoO}_2$  and  $\text{MoO}_3$  exfoliated states are clearly offsite from this path. The small red dots are the projections of data points to individual planes.

### Investigation of the reaction yield

The final concentration of  $\text{MoO}_x$  was determined by evaporating the sample prepared from 60 mg/ml of  $\text{MoS}_2$  and weighting the precipitate. This way we determined the concentration in the solution prepared from 60 mg/ml and by subsequent dilution we prepared a set of samples for the calibration. Calibration curve (Fig. S34) was constructed from the absorbance of the samples at 1 000 nm.

Using this calibration curve, we could determine approximate concentration of the final product fraction directly from the absorbance measurement. The final concentrations of  $\text{MoO}_x$  solutions determined in this way showed, that the yield of  $\text{MoO}_x$  is increasing linearly with the increasing initial concentration of  $\text{MoS}_2$  (Fig. S35). To reliably extrapolate the linear fit below 10 mg/ml initial concentration, we narrowed the confidence interval by using the fit of the

absorbance values at a wavelength of 1 000 nm (Fig. S36). The extrapolation shows, that the  $\text{MoO}_x$  starts to appear at the initial concentration of  $\text{MoS}_2$  equal to  $6 \pm 2.5$  mg/ml.

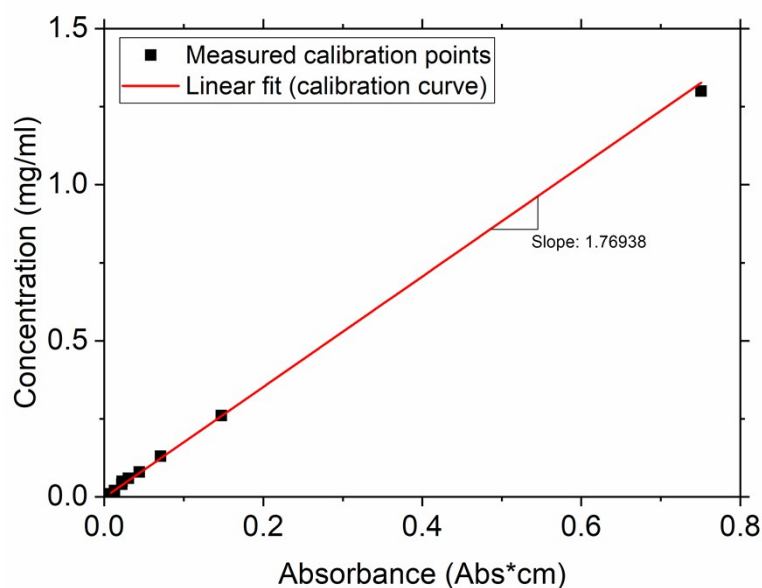

Fig. S34: Calibration curve for the determination of the  $\text{MoO}_x$  concentration.

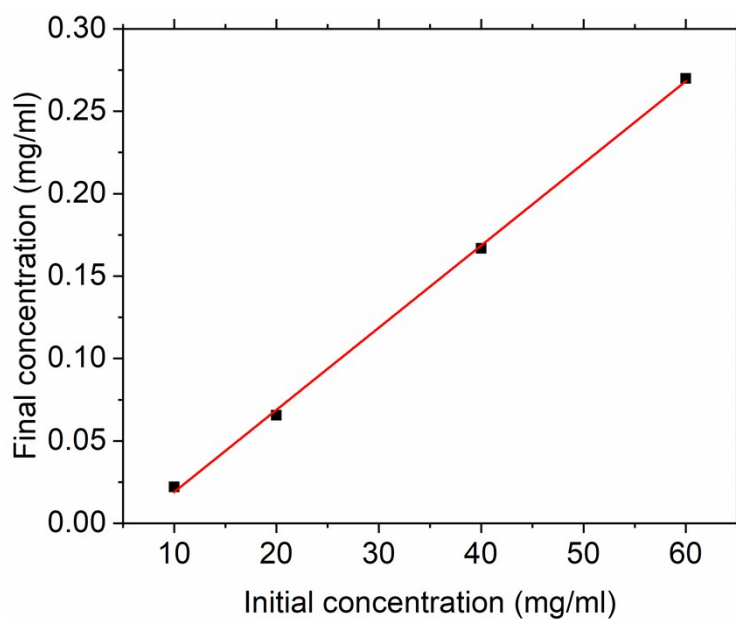

Fig S35: Final concentration of  $\text{MoO}_x$  as a function of the initial concentration of  $\text{MoS}_2$  as determined from the absorbance.

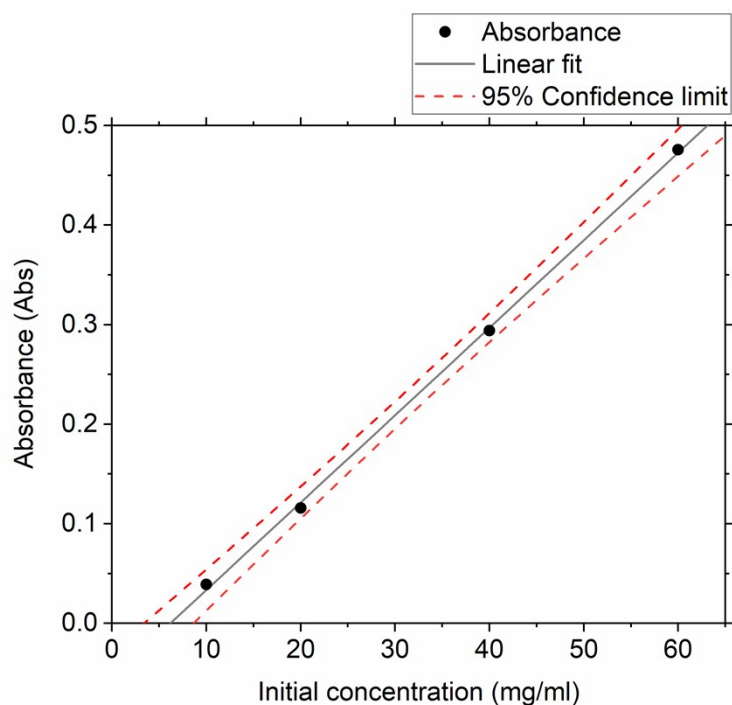

Fig. S36: The extrapolation of the absorbance of  $\text{MoO}_x$  peak showing the non-zero starting point.

The samples with the concentration close to the threshold point of the  $\text{MoO}_x$  production were prepared. We found that the presence of the  $\text{MoO}_x$  is already observable in the samples with the initial concentration larger than 5 g/ml (Fig. S37a). However, until the initial concentration is lower than 12.5 mg/ml the final product is present only in a small amount and the  $\text{MoS}_2$  excitonic peaks are still dominating the absorbance spectra. After the initial concentration is raised above 12.5 mg/ml the final concentration of  $\text{MoO}_x$  is increasing linearly (Fig. S37b). Based on these findings, we can specify the threshold of initial concentration to be around 6.5 mg/ml. If the initial concentration is between 6 mg/ml and 12.5 mg/ml only a small amount of  $\text{MoO}_x$  is produced and the  $\text{MoS}_2$  dominates the final product (Fig. 1). Further increase of the initial concentration over 12.5 mg/ml results in a stable production of  $\text{MoO}_x$  with a linearly increasing final concentration (Fig. S35, S37b).

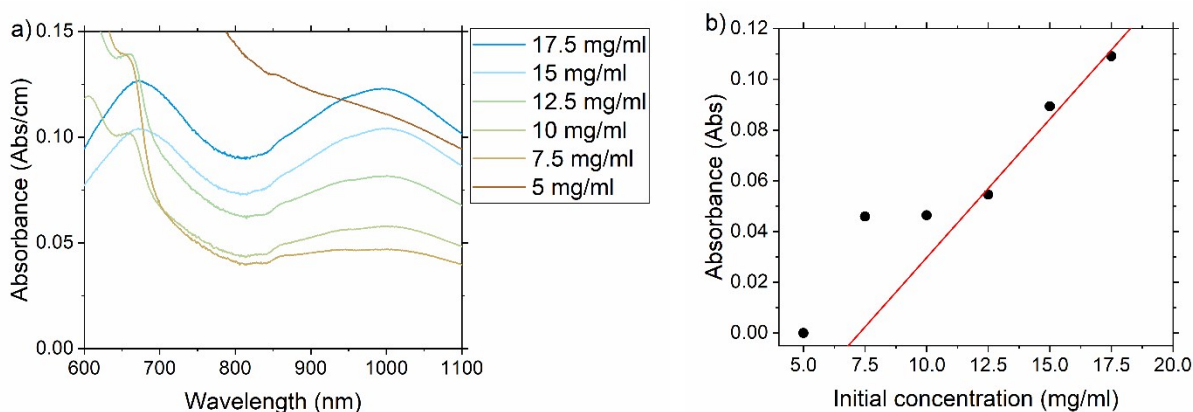

Fig. S37: a) The absorbance spectra of the samples with the initial concentration between 5 mg/ml and 17.5 mg/ml. b) The absorbance of the MoO<sub>x</sub> peak at 1 000 nm showing a linear increase above the threshold concentration.

### Preventing the oxidation

From our findings the neutralization of excessive charge before ultrasonication leads to an enhanced production of the exfoliated MoS<sub>2</sub> and effectively terminates its oxidation. To confirm this, we prepared two solutions with the initial MoS<sub>2</sub> concentration of 20 mg/ml. In the first case, the weighted MoS<sub>2</sub> was dissolved in the as-prepared 45% ethanol solution as usual. The pH of the as prepared solution was 3.0. In the second case, we altered the pH of the 45% ethanol solution using KOH. After we dissolved the MoS<sub>2</sub> powder in this solution, the pH of the resulting solution was 7.3. After the ultrasonication and centrifugation of both solutions, we obtained one product with the standard blue color of MoO<sub>x</sub>. The second product with the altered pH resulted in a green MoS<sub>2</sub> solution (Fig. S38). This confirmed that the loss of MoS<sub>2</sub> is primarily due to a drop in the pH and a proper compensation of the additional charge can inhibit the oxidation.

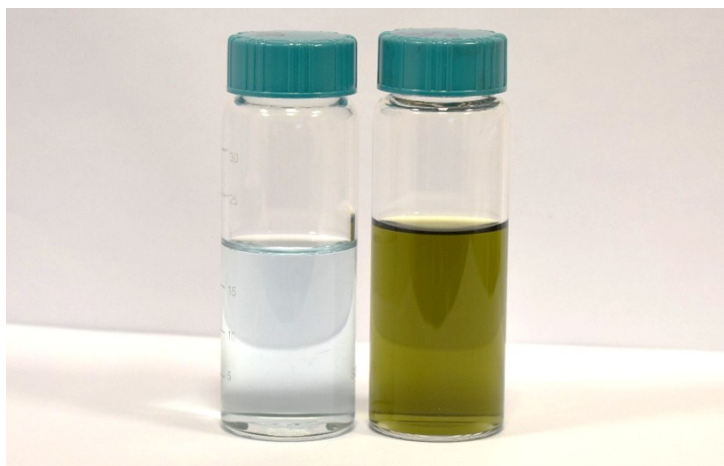

Fig. S38: The control experiment, where on the left the standard procedure was performed with the initial  $\text{MoS}_2$  concentration of 20 mg/ml. On the right the same process was performed with the exception of additional charge compensation. The charge compensation resulted in the exfoliation of  $\text{MoS}_2$  instead of its oxidation.
